# Supplementary material
Source: publisher figshare collection journal article supplement (https://tandf.figshare.com/ndownloader/files/16350377)
Supplement: Supplementary file 1 [file 16350377]

**Supplementary methods**

**Other systemic therapies used as exclusion criteria**

**Chemotherapy:** Carboplatin, Cisplatin, Docetaxel, Etoposide / Etoposide phosphate, Gemcitabine hydrochloride, Irinotecan hydrochloride, Paclitaxel, Pemetrexed, Vinblastine sulfate, Vinorelbine tartrate; **Targeted therapy:** Alectinib, Bevacizumab, Carbozantinib, Ceritinib, Cetuximab, Crizotinib, Dabrafenib, Gefitinib, Necitumumab, Osimertinib, Ramucirumab, Trastuzumab, Trametinib, Vemurafenib; **Immunotherapy**: Nivolumab, Pembrolizumab

**Chemotherapy Regimens for Adjuvant and Neoadjuvant Therapy**

Cisplatin + vinorelbine; Cisplatin + gemcitabine; Cisplatin + docetaxel; Cisplatin + pemetrexed; Paclitaxel + carboplatin. Patients on cisplatin + etoposide combination will not be considered as it is the most commonly used combination therapy regimen for small cell lung cancer(Kalemkerian et al. Small cell lung cancer clinical practice guidelines in oncology. JNCCN Journal of the National Comprehensive Cancer Network. 2011;9:1086–113)

**Codes to be used for the identification of lung surgery1–3**

**ICD-9 codes:** 32.01, 32.01, 32.01, 32.01, 32.01, 32.01, 32.01, 32.01, 32.01, 32.01, 32.01, 32.01, 32.01, 32.01, 32.01, 32.01, 32.01, 32.01, 32.01, 32.01, 32.01, 32.01, 32.01, 32.01, 32.01, 32.01, 32.01, 32.01, 32.01, 32.01, 32.01, 32.01, 32.09, 32.09, 32.09, 32.09, 32.09, 32.09, 32.09, 32.09, 32.09, 32.09, 32.09, 32.09, 32.09, 32.09, 32.09, 32.09, 32.09, 32.09, 32.09, 32.09, 32.09, 32.09, 32.09, 32.09, 32.09, 32.09, 32.09, 32.09, 32.09, 32.09, 32.09, 32.09, 32.09, 32.09, 32.09, 32.09, 32.09, 32.09, 32.09, 32.09, 32.09, 32.09, 32.09, 32.09, 32.09, 32.09, 32.09, 32.09, 32.1, 32.1, 32.1, 32.1, 32.1, 32.1, 32.1, 32.1, 32.1, 32.1, 32.1, 32.1, 32.1, 32.1, 32.1, 32.1, 32.2, 32.2, 32.2, 32.2, 32.2, 32.2, 32.2, 32.2, 32.21, 32.21, 32.21, 32.21, 32.21, 32.21, 32.21, 32.21, 32.21, 32.21, 32.21, 32.21, 32.21, 32.21, 32.21, 32.22, 32.22, 32.22, 32.22, 32.22, 32.22, 32.22, 32.22, 32.22, 32.22, 32.22, 32.22, 32.22, 32.22, 32.22, 32.22, 32.22, 32.22, 32.23, 32.23, 32.23, 32.23, 32.23, 32.23, 32.23, 32.23, 32.23, 32.24, 32.24, 32.24, 32.24, 32.24, 32.24, 32.24, 32.24, 32.24, 32.25, 32.25, 32.25, 32.25, 32.25, 32.25, 32.25, 32.25, 32.25, 32.26, 32.26, 32.26, 32.26, 32.26, 32.26, 32.26, 32.26, 32.26, 32.26, 32.26, 32.26, 32.26, 32.26, 32.26, 32.26, 32.26, 32.26, 32.27, 32.27, 32.27, 32.27, 32.27, 32.27, 32.27, 32.27, 32.28, 32.28, 32.28, 32.28, 32.28, 32.28, 32.28, 32.28, 32.28, 32.28, 32.28, 32.28, 32.28, 32.28, 32.28, 32.28, 32.28, 32.28, 32.28, 32.29, 32.29, 32.29, 32.29, 32.29, 32.29, 32.29, 32.29, 32.29, 32.29, 32.29, 32.29, 32.29, 32.29, 32.29, 32.29, 32.29, 32.29, 32.29, 32.29, 32.29, 32.29, 32.29, 32.29, 32.29, 32.29, 32.29, 32.29, 32.29, 32.29, 32.29, 32.29, 32.29, 32.29, 32.29, 32.29, 32.29, 32.29, 32.29, 32.29, 32.29, 32.29, 32.29, 32.29, 32.29, 32.29, 32.29, 32.29, 32.29, 32.29, 32.29, 32.29, 32.29, 32.29, 32.3, 32.3, 32.3, 32.3, 32.3, 32.3, 32.3, 32.3, 32.3, 32.39, 32.39, 32.39, 32.39, 32.39, 32.39, 32.39, 32.41, 32.41, 32.41, 32.41, 32.41, 32.49, 32.49, 32.49, 32.49, 32.49, 32.5, 32.5, 32.5, 32.59, 32.59, 32.59, 32.6, 32.6, 32.6, 32.6, 32.6, 32.6, 32.6, 32.9, 32.9, 32.9, 32.9, 32.9, 32.9, 32.9, 32.9, 32.9, 32.9, 32.9, 32.9. **ICD-10 codes:** 0B534ZZ, 0B538ZZ, 0B544ZZ, 0B548ZZ, 0B554ZZ, 0B558ZZ, 0B564ZZ, 0B568ZZ, 0B574ZZ, 0B578ZZ, 0B584ZZ, 0B588ZZ, 0B594ZZ, 0B598ZZ, 0B5B4ZZ, 0B5B8ZZ, 0BB34ZZ, 0BB38ZZ, 0BB44ZZ, 0BB48ZZ, 0BB54ZZ, 0BB58ZZ, 0BB64ZZ, 0BB68ZZ, 0BB74ZZ, 0BB78ZZ, 0BB84ZZ, 0BB88ZZ, 0BB94ZZ, 0BB98ZZ, 0BBB4ZZ, 0BBB8ZZ, 0B530ZZ, 0B533ZZ, 0B537ZZ, 0B540ZZ, 0B543ZZ, 0B547ZZ, 0B550ZZ, 0B553ZZ, 0B557ZZ, 0B560ZZ, 0B563ZZ, 0B567ZZ, 0B570ZZ, 0B573ZZ, 0B577ZZ, 0B580ZZ, 0B583ZZ, 0B587ZZ, 0B590ZZ, 0B593ZZ, 0B597ZZ, 0B5B0ZZ, 0B5B3ZZ, 0B5B7ZZ, 0BB30ZZ, 0BB33ZZ, 0BB37ZZ, 0BB40ZZ, 0BB43ZZ, 0BB47ZZ, 0BB50ZZ, 0BB53ZZ, 0BB57ZZ, 0BB60ZZ, 0BB63ZZ, 0BB67ZZ, 0BB70ZZ, 0BB73ZZ, 0BB77ZZ, 0BB80ZZ, 0BB83ZZ, 0BB87ZZ, 0BB90ZZ, 0BB93ZZ, 0BB97ZZ, 0BBB0ZZ, 0BBB3ZZ, 0BBB7ZZ, 0BT30ZZ, 0BT34ZZ, 0BT40ZZ, 0BT44ZZ, 0BT50ZZ, 0BT54ZZ, 0BT60ZZ, 0BT64ZZ, 0BT70ZZ, 0BT74ZZ, 0BT80ZZ, 0BT84ZZ, 0BT90ZZ, 0BT94ZZ, 0BTB0ZZ, 0BTB4ZZ, 0BBC4ZZ, 0BBD4ZZ, 0BBF4ZZ, 0BBG4ZZ, 0BBH4ZZ, 0BBJ4ZZ, 0BBK4ZZ, 0BBL4ZZ, 0BQK0ZZ, 0BQK3ZZ, 0BQK4ZZ, 0BQK7ZZ, 0BQK8ZZ, 0BQL0ZZ, 0BQL3ZZ, 0BQL4ZZ, 0BQL7ZZ, 0BQL8ZZ, 0BQM0ZZ, 0BQM3ZZ, 0BQM4ZZ, 0BQM7ZZ, 0BQM8ZZ, 0B5K0ZZ, 0B5K3ZZ, 0B5K7ZZ, 0B5L0ZZ, 0B5L3ZZ, 0B5L7ZZ, 0B5M0ZZ, 0B5M3ZZ, 0B5M7ZZ, 0BBK0ZZ, 0BBK3ZZ, 0BBK7ZZ, 0BBL0ZZ, 0BBL3ZZ, 0BBL7ZZ, 0BBM0ZZ, 0BBM3ZZ, 0BBM7ZZ, 0B5C0ZZ, 0B5D0ZZ, 0B5F0ZZ, 0B5G0ZZ, 0B5H0ZZ, 0B5J0ZZ, 0B5K0ZZ, 0B5L0ZZ, 0B5M0ZZ, 0B5C3ZZ, 0B5D3ZZ, 0B5F3ZZ, 0B5G3ZZ, 0B5H3ZZ, 0B5J3ZZ, 0B5K3ZZ, 0B5L3ZZ, 0B5M3ZZ, 0B5C4ZZ, 0B5D4ZZ, 0B5F4ZZ, 0B5G4ZZ, 0B5H4ZZ, 0B5J4ZZ, 0B5K4ZZ, 0B5L4ZZ, 0B5M4ZZ, 0B5C7ZZ, 0B5C8ZZ, 0B5D7ZZ, 0B5D8ZZ, 0B5F7ZZ, 0B5F8ZZ, 0B5G7ZZ, 0B5G8ZZ, 0B5H7ZZ, 0B5H8ZZ, 0B5J7ZZ, 0B5J8ZZ, 0B5K7ZZ, 0B5K8ZZ, 0B5L7ZZ, 0B5L8ZZ, 0B5M7ZZ, 0B5M8ZZ, 0B538ZZ, 0B548ZZ, 0B558ZZ, 0B568ZZ, 0B578ZZ, 0B588ZZ, 0B598ZZ, 0B5B8ZZ, 0B5C8ZZ, 0B5D8ZZ, 0B5F8ZZ, 0B5G8ZZ, 0B5H8ZZ, 0B5J8ZZ, 0B5K8ZZ, 0B5L8ZZ, 0B5M8ZZ, 0BBC8ZZ, 0BBD8ZZ, 0BBF8ZZ, 0BBG8ZZ, 0BBH8ZZ, 0BBJ8ZZ, 0BBK8ZZ, 0BBL8ZZ, 0BBM4ZZ, 0BBM8ZZ, 0B5C0ZZ, 0B5C3ZZ, 0B5C7ZZ, 0B5D0ZZ, 0B5D3ZZ, 0B5D7ZZ, 0B5F0ZZ, 0B5F3ZZ, 0B5F7ZZ, 0B5G0ZZ, 0B5G3ZZ, 0B5G7ZZ, 0B5H0ZZ, 0B5H3ZZ, 0B5H7ZZ, 0B5J0ZZ, 0B5J3ZZ, 0B5J7ZZ, 0B5K0ZZ, 0B5K3ZZ, 0B5K7ZZ, 0B5L0ZZ, 0B5L3ZZ, 0B5L7ZZ, 0B5M0ZZ, 0B5M3ZZ, 0B5M7ZZ, 0BBC0ZZ, 0BBC3ZZ, 0BBC7ZZ, 0BBD0ZZ, 0BBD3ZZ, 0BBD7ZZ, 0BBF0ZZ, 0BBF3ZZ, 0BBF7ZZ, 0BBG0ZZ, 0BBG3ZZ, 0BBG7ZZ, 0BBH0ZZ, 0BBH3ZZ, 0BBH7ZZ, 0BBJ0ZZ, 0BBJ3ZZ, 0BBJ7ZZ, 0BBK0ZZ, 0BBK3ZZ, 0BBK7ZZ, 0BBL0ZZ, 0BBL3ZZ, 0BBL7ZZ, 0BBM0ZZ, 0BBM3ZZ, 0BBM7ZZ, 0BBC4ZZ, 0BBD4ZZ, 0BBF4ZZ, 0BBG4ZZ, 0BBH4ZZ, 0BBJ4ZZ, 0BBK4ZZ, 0BBL4ZZ, 0BTH4ZZ, 0BBK0ZZ, 0BBK3ZZ, 0BBK7ZZ, 0BBL0ZZ, 0BBL3ZZ, 0BBL7ZZ, 0BTH0ZZ, 0BTC4ZZ, 0BTD4ZZ, 0BTF4ZZ, 0BTG4ZZ, 0BTJ4ZZ, 0BTC0ZZ, 0BTD0ZZ, 0BTF0ZZ, 0BTG0ZZ, 0BTJ0ZZ, 0BTK4ZZ, 0BTL4ZZ, 0BTM4ZZ, 0BTK0ZZ, 0BTL0ZZ, 0BTM0ZZ, 01B30ZZ, 01BL0ZZ, 0BTK0ZZ, 0BTL0ZZ, 0BTM0ZZ, 0PB10ZZ, 0PB20ZZ, 0B5K0ZZ, 0B5K3ZZ, 0B5K7ZZ, 0B5L0ZZ, 0B5L3ZZ, 0B5L7ZZ, 0B5M0ZZ, 0B5M3ZZ, 0B5M7ZZ, 0BBM0ZZ, 0BBM3ZZ, 0BBM7ZZ. **CPT codes:** 32441, 32442, 32443, 32444, 32445, 32446, 32447, 32448, 32449, 32450, 32451, 32452, 32453, 32454, 32455, 32456, 32457, 32458, 32459, 32460, 32461, 32462, 32463, 32464, 32465, 32466, 32467, 32468, 32469, 32470, 32471, 32472, 32473, 32474, 32475, 32476, 32477, 32478, 32479, 32480, 32481, 32482, 32483, 32484, 32485, 32486, 32487, 32488, 32489, 32490, 32491, 32492, 32493, 32494, 32495, 32496, 32497, 32498, 32499, 32500, 32501, 32502, 32503, 32504, 32505, 32506, 32507, 32508, 32509, 32510, 32511, 32512, 32513, 32514, 32515, 32516, 32517, 32518, 32519, 32520, 32521, 32522, 32523, 32524, 32525, 32657, 32663

**References**

1. Sheng Duh M, Reynolds Weiner J, Lefebvre P, Neary M, Skarin AT. Costs associated with intravenous chemotherapy administration in patients with small cell lung cancer: a retrospective claims database analysis. Curr Med Res Opin. 2008;24:967–974.

2. Hardy D, Liu CC, Xia R, Cormier JN, Chan W, White A et al. Racial disparities and treatment trends in a large cohort of elderly black and white patients with nonsmall cell lung cancer. Cancer. 2009;115:2199–2211.

3. Meguid RA, Brooke BS, Chang DC, Sherwood JT, Brock MV, Yang SC. Are surgical outcomes for lung cancer resections improved at teaching hospitals?. Ann Thorac Surg. 2008;85:1015–1025.
